# Supplementary material for: Developing conversed microsatellite markers and their implications in evolutionary analysis of the Bemisia tabaci complex
Source: PubMed Central journal article supplement — Sci Rep. 2014 Sep 15;4:6351. doi: 10.1038/srep06351 (PMC4163675; doi:10.1038/srep06351), 2014-09-15
Supplement: srep06351-s1.pdf [file srep06351-s1.pdf]

1 **Supplementary information:**

2

3 **Developing conversed microsatellite markers and their implications in evolutionary**  
4 **analysis of the *Bemisia tabaci* complex**

5

6 Hua-Ling Wang<sup>1</sup>, Jiao Yang<sup>1</sup>, Laura M. Boykin<sup>2</sup>, Qiong-Yi Zhao<sup>3</sup>, Yu-Jun Wang<sup>1</sup>, Shu-Sheng  
7 Liu<sup>1</sup>, Xiao-Wei Wang<sup>1,\*</sup>

8

9 <sup>1</sup>Ministry of Agriculture Key Laboratory of Agricultural Entomology, Institute of Insect  
10 Sciences, Zhejiang University, Hangzhou 310058, China

11 <sup>2</sup>ARC Centre of Excellence, Plant Energy Biology, The University of Western Australia, 35  
12 Stirling Highway, Crawley 6009 Western Australia

13 <sup>3</sup>Queensland Brain Institute, University of Queensland, Brisbane, Qld 4072, Australia

14

15

16 **Table S1** Microsatellites predicted from the transcriptomes of the three species. Microsatellite  
17 motifs, sizes and relative microsatellite-containing sequences were listed.

18

19 **Table S2** The location of microsatellites in 3'UTR, 5'UTR and CDS regions. The location,  
20 microsatellites motif and nr annotation of each microsatellite-containing sequences in  
21 MEAM1, MED and Asia II 3 were shown.

22

23 **Table S3** Number of microsatellite-containing genes mapped to KEGG pathway among the  
24 three species.

25

26 **Table S4** Microsatellite-containing genes in 'Lysosome', 'Drug metabolism-other enzymes'  
27 and 'MAPK' pathways.

28

29 **Table S5** Characteristics of the identified microsatellites. Microsatellite primer sequences,  
30 PCR annealing temperature, repeat motifs, allele size ranges, numbers of alleles and  
31 functional annotations were shown.

32

33 **Table S6** Cross-species amplification of microsatellites from the three species. No  
34 amplification products are shown by "\_".

35

36 **Table S7** The gene diversity of each marker revealed in the six species of the *B. tabaci*  
37 complex.
